# Supplementary material for: Delimiting the genera of the Ficinia Clade (Cypereae, Cyperaceae) based on molecular phylogenetic data
Source: PeerJ journal article supplement (doi:10.7717/peerj.10737), 2021-01-26

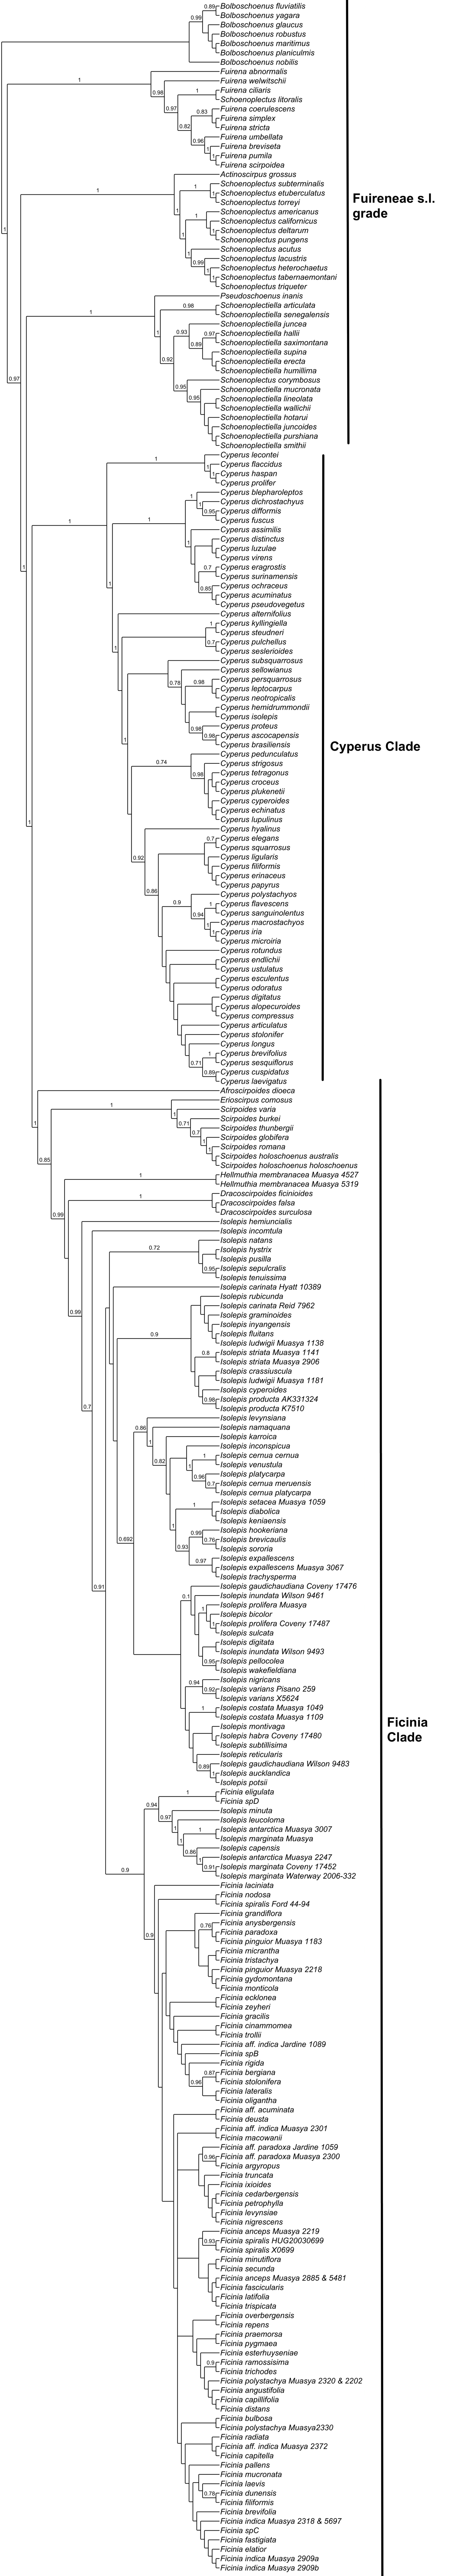

Supplement: Figure_S2_MrBayes_Chloroplast_revised.pdf [file Figure_S2_MrBayes_Chloroplast_revised.pdf]
