# Supplementary material for: Delimiting the genera of the Ficinia Clade (Cypereae, Cyperaceae) based on molecular phylogenetic data
Source: PeerJ. 2021 Jan 26;9:e10737. doi: 10.7717/peerj.10737 (PMC7845527; doi:10.7717/peerj.10737)
Supplement: Supplemental Information 3 — GenBank accessions with prefix ‘MW’ are newly reported in this study. [file peerj-09-10737-s003.xlsx]

## Sheet: TABLE S1
Name in dataset	Name with taxonomic authority	Voucher collector & number, (Herbarium code)	ETS	ITS	matK	ndhF	rbcL	rps16	trnLF
Afroscirpoides dioeca	Afroscirpoides dioeca (Kunth) García-Madrid	Muasya 5650 (BOL)	KM462219	KM462289		-	-	KM462356	KM462484
Dracoscirpoides falsa	Dracoscirpoides falsa (C.B.Clarke) Muasya	Muasya 6792 (BOL)	-	KM462304	-	-	KT183345	KT183344	-
Dracoscirpoides ficinioides	Dracoscirpoides ficinioides (Kunth) Muasya	Muasya & Stirton 3689 (BOL)	-	KM462312	-	-	-	KM462379	KM462506
Dracoscirpoides surculosa	Dracoscirpoides surculosa Muasya, Reynders & Goetgh.	Muasya 7079b (BOL)	KM462241	KM462315	-	-	-	KM462382	KM462509
Erioscirpus comosus	Erioscirpus comosus (Wall.) Palla	Ikeda et al. 4032 (TI)	KM462231	KM462303	-	-	-	KM462370	KM462497
Ficinia aff. acuminata	Ficinia aff. acuminata (Nees) Nees	Muasya 2358 (BOL)	MW267874	-	-	-	-	MW278895	-
Ficinia aff. dura	Ficinia aff. dura Turrill	Hilliard & Burtt 14880 (BOL)	-	MW278956	-	-	-	-	-			blue	Garcia-Madrid et al. 2015
Ficinia aff. indica Jardine 1089	Ficinia aff. indica (Lam.) H.Pfeiff.	Jardine 1089 (BOL)	-	-	-	-	-	-	MW279026
Ficinia aff. indica Muasya 2301	Ficinia aff. indica (Lam.) H.Pfeiff.	Muasya 2301 (BOL)	MW267875	MW278957	-	-	MW339533	-	-
Ficinia aff. indica Muasya 2372	Ficinia aff. indica (Lam.) H.Pfeiff.	Muasya 2372 (BOL)	MW267876	MW278958	-	-	-	MW278896	-
Ficinia aff. paradoxa Jardine 1059	Ficinia aff. paradoxa (Schrad.) Nees	Jardine 1059 (BOL)	-	-	-	-	-	-	MW279027
Ficinia aff. paradoxa Muasya 2300	Ficinia aff. paradoxa (Schrad.) Nees	Muasya 2300 (BOL)	-	MW278959	-	-	-	MW278897	-
Ficinia anceps Muasya 2219	Ficinia anceps Nees	Muasya 2219 (BOL)	-	MW278960	-	-	MW339519	MW278898	-
Ficinia anceps Muasya 2885 or 5481	Ficinia anceps Nees	Muasya 2885 (BOL) & 5481 matK (BOL)	MW267877	-	MW339657	-	-	MW278899	MW279028
Ficinia angustifolia	Ficinia angustifolia (Schrad.) C.B.Clarke	Muasya 2202 (BOL) & 2210 rbcL (BOL)	-	GU012396	-	-	MW339436	GU012358	-
Ficinia anysbergensis	Ficinia anysbergensis Muasya	Muasya 2363 (BOL) & 2352 rbcL (BOL)	-	MW278961	-	-	MW339423	MW278900	-
Ficinia argyropus	Ficinia argyropus Nees	Muasya 2233 (BOL) & 5654 matK-rbcL (BOL)	-	MW278962	MW339609	-	MW339467	MW278901	-
Ficinia bergiana	Ficinia bergiana Kunth (=Ficinia tristachya (Rottb.) Nees)	Muasya 2337 (BOL)	-	AB685861	-	-	EF200588	EF078974	EF178593		LEGEND	black	Madagascar dataset
Ficinia brevifolia	Ficinia brevifolia Nees ex Kunth	Muasya 2205 (BOL) & 5433 matK (BOL) & 2228 rbcL (BOL)	-	GU012397	MW339606	-	MW339567	GU012359	-
Ficinia bulbosa	Ficinia bulbosa (L.) Nees	Muasya 2359 (BOL) & 2228 rbcL (BOL)	-	GU012398	-	-	MW339567	GU012360	-
Ficinia capillifolia	Ficinia capillifolia (Schrad.) C.B.Clarke	Muasya 2229 (BOL)	-	MW278963	-	-	MW339417	MW278902	-
Ficinia capitella	Ficinia capitella (Thunb.) Nees	Muasya 2325 (BOL) & 5495 matK (BOL)	MW267878	MW278964	MW339650	-	-	MW278903	-
Ficinia cedarbergensis	Ficinia cedarbergensis T.H.Arnold & Gordon-Gray	Muasya 2313 (BOL) & 3275 matK (BOL) & 2308 rbcL (BOL)	MW267879	MW278965	MW339619	-	MW339571	MW278904	-
Ficinia cinammomea	Ficinia cinnamomea C.B.Clarke	Faden 96-433 (K)	-	MW278966	-	-	MW267911	-	MW279029
Ficinia deusta	Ficinia deusta (P.J.Bergius) Levyns	Muasya 2214 (BOL)	MW267880	GU012399	-	-	MW339407	GU012361	-
Ficinia distans	Ficinia distans C.B.Clarke	Muasya 2283 (BOL)	JX566725	-	-	-	EF178548	-	EF178594
Ficinia dunensis	Ficinia dunensis Levyns	Muasya 2217 rbcL (BOL) & 5472 matK (BOL)	-	MW278967	MW339416	-	MW339599	MW278905	-
Ficinia ecklonea	Ficinia ecklonea (Steud.) Nees	Muasya 2345 (BOL)	MW267881	MW278968	-	-	MW339528	MW278906	-
Ficinia elatior	Ficinia elatior Levyns	Muasya 2215 (BOL)	-	MW278969	-	-	MW339462	MW278907	-
Ficinia eligulata	Ficinia eligulata Gordon-Gray ex Muasya	Muasya 2714 (BOL)	KM462249	KM462325	-	-	-	KM462390	KM462519
Ficinia esterhuyseniae	Ficinia esterhuyseniae Muasya	Muasya 2312 (BOL)	JX566728	GU012400	-	-	EF178549	EF078975	EF178590
Ficinia fascicularis	Ficinia fascicularis Nees	Hilliard & Burtt 13223 (BOL) & 5870 matK-rbcL (BOL)	-	MW278970	MW339652	-	MW339553	-	-
Ficinia fastigiata	Ficinia fastigiata (Thunb.) Nees	Muasya 2230 (BOL)	-	GU012401	-	-	MW339563	GU012362	-
Ficinia filiculmea	Ficinia filiculmea B.L.Burtt	Hilliard & Burtt 15053 (BOL)	-	-	-	-	-	-	-
Ficinia filiformis	Ficinia filiformis (Lam.) Schrad. (as Ficinia tenuifolia Kunth)	Muasya 2360 (BOL)	MW267882	GU012410	-	-	-	GU012371	-
Ficinia gracilis	Ficinia gracilis Schrad.	Muasya 2355 (BOL) & 5187 matK (BOL)	MW267883	MW278971	MW339635	-	EF178589	MW278908	EF178595
Ficinia grandiflora	Ficinia grandiflora T.H.Arnold & Gordon-Gray	Muasya 2331 (BOL)	MW267884	MW278972	-	-	MW339556	-	-
Ficinia gydomontana	Ficinia gydomontana T.H.Arnold & Gordon-Gray	Muasya 2333 (BOL)	MW267885	MW278973	-	-	EF178551	MW278909	EF178596
Ficinia indica Muasya 2318 or 5697	Ficinia indica (Lam.) H.Pfeiff.	Muasya 2318 (BOL, K) & 5697 matK (BOL)	KM462253	GU012402	MW339610	AM999925	EF178552	GU012363	EF178597
Ficinia indica Muasya 2909a	Ficinia indica (Lam.) H.Pfeiff.	Muasya 2909a (BOL)	MW267886	MW278974	-	-	-	MW278910	MW279030
Ficinia indica Muasya 2909b	Ficinia indica (Lam.) H.Pfeiff.	Muasya 2909b (BOL)	MW267887	MW278975	-	-	-	MW278911	MW279031
Ficinia ixioides	Ficinia ixioides Nees	Muasya 2207 (BOL) & 5692 rbcL (BOL)	-	MW278976	-	-	MW339481	MW278912	-
Ficinia laciniata	Ficinia laciniata (Thunb.) Nees	Muasya 2340 (BOL) & 5897 matK (BOL)	MW267888	MW278977	MW339648	-	EF178553	MW278913	EF178598
Ficinia laevis	Ficinia laevis Nees	Muasya 5656 (BOL)	-	-	MW339602	-	MW339451	-	-
Ficinia lateralis	Ficinia lateralis (Vahl) Kunth	Muasya 5476 (BOL)	-	-	MW339616	-	MW339486	-	-
Ficinia latifolia	Ficinia latifolia T.H.Arnold & Gordon-Gray	Muasya 5892 (BOL)	-	-	MW339604	-	MW339458	-	-
Ficinia levynsiae	Ficinia levynsiae T.H.Arnold & Gordon-Gray	Muasya 2261 (BOL)	MW267889	GU012403	-	-	MW339578	GU012364	-
Ficinia macowanii	Ficinia macowanii C.B.Clarke	Muasya 2249 (BOL)	-	MW278978	-	-	MW339572	MW278914	-
Ficinia micrantha	Ficinia micrantha C.B.Clarke	Muasya 2268 (BOL) & 5671 matK (BOL)	MW267890	GU012382	MW339585	-	MW339550	GU012346	-
Ficinia minutiflora	Ficinia minutiflora C.B.Clarke	Muasya 2257 (BOL)	-	MW278979	-	-	MW339569	MW278915	-
Ficinia monticola	Ficinia monticola Kunth	Muasya 2287 (BOL)	MW267891	MW278980	-	-	-	MW278916	-
Ficinia mucronata	Ficinia mucronata C.B.Clarke	Muasya 5682 (BOL)	-	-	MW339659	-	MW339565	-	-
Ficinia nana	Ficinia nana B.L.Burtt	Hilliard & Burtt 13669 (BOL)	-	MW278981	-	-	-	-	-
Ficinia nigrescens	Ficinia nigrescens (Schrad.) J.Raynal	Muasya 2350 (BOL) & 5775 matK (BOL)	MW267892	GU012404	MW339639	-	MW339409	GU012365	-
Ficinia nodosa	Ficinia nodosa (Rottb.) Goetgh., Muasya & D.A.Simpson	Stind 21216 (K) & 5324 matK (BOL)	-	MW278982	MW339634	-	MW267912	MW278917	MW279032
Ficinia oligantha	Ficinia oligantha (Steud.) J.Raynal	Muasya 2204 (BOL) & 2200 rbcL (BOL)	-	GU012405	-	-	MW339523	GU012366	-
Ficinia overbergensis	Ficinia overbergensis Muasya & C.H.Stirt.	Muasya & Garcia-Madrid SA11 (BOL)	KM462252	KM462329	-	-	-	KM462393	KM462523
Ficinia pallens	Ficinia pallens (Schrad.) Nees	Muasya 2225 (BOL)	MW267893	GU012406	-	-	MW339522	GU012367	-
Ficinia paradoxa	Ficinia paradoxa (Schrad.) Nees	Muasya 2338 (BOL)	-	MW278983	-	-	MW339473	MW278918	-
Ficinia petrophylla	Ficinia petrophylla T.H.Arnold & Gordon-Gray	Muasya 2364 (BOL) & 5918 matK (BOL)	MW267894	MW278984	MW339640	-	MW339403	MW278919	-
Ficinia pinguior Muasya 1183	Ficinia pinguior C.B.Clarke	Muasya 1183 (BOL)	-	GU012407	-	-	AJ404703	GU012368	AJ295772
Ficinia pinguior Muasya 2218	Ficinia pinguior C.B.Clarke	Muasya 2218 (BOL)	MW267895	MW278985	-	-	MW339577	MW278920	-
Ficinia polystachya Muasya 2320 or 2202	Ficinia polystachya Levyns	Muasya 2320 (BOL) & 2202 rbcL (BOL)	-	MW278986	-	-	MW339420	MW278921	-
Ficinia polystachya Muasya 2330	Ficinia polystachya Levyns	Muasya 2330 (BOL)	-	-	-	-	EF178554	-	EF178599
Ficinia praemorsa	Ficinia praemorsa Nees	Muasya 2348 (BOL)	-	GU012408	-	-	MW339402	GU012369	-
Ficinia pygmaea	Ficinia pygmaea Boeckeler (as Ficinia limosa Levyns)	Muasya 2296 (BOL) & 2295 rbcL (BOL)	JX566727	JX566734	-	-	MW339428	JX566747	-
Ficinia radiata	Ficinia radiata (L.f.) Kunth	Muasya 2310 (BOL)	-	JX566738	-	-	EF200589	EF078976	-
Ficinia ramossisima	Ficinia ramosissima Kunth	Muasya 2288 (BOL)	MW267896	MW278987	-	-	EF178555	MW278922	EF178600
Ficinia repens	Ficinia repens Kunth	Muasya 2347 (BOL)	-	MW278988	-	-	EF178556	MW278923	EF178601
Ficinia rigida	Ficinia rigida Levyns	Muasya 2319 (BOL, K) & 5880 matK (BOL)	-	AB685863	MW339653	-	EF178557	EF174387	EF178602
Ficinia secunda	Ficinia secunda (Vahl) Kunth	Muasya 2211 (BOL) & 5894 matK (BOL)	MW267897	GU012409	MW339613	-	MW339453	GU012370	-
Ficinia spB	Ficinia spB	Muasya & García-Madrid SA12 (BOL)	KM462250	KM462326	-	-	-	KM462391	KM462520
Ficinia spC	Ficinia spC	Muasya & García-Madrid 7040 (BOL)	KM462251	KM462327	-	-	-	KM462392	KM462521
Ficinia spD	Ficinia sp.	Sonnenberg 347 (GENT)	-	MW278989	-	-	-	MW278924	-
Ficinia spiralis Ford 44/94	Ficinia spiralis (A.Rich.) Muasya & de Lange	Ford 44/94 (NU)	-	MW278990	-	-	AJ404701	-	AJ295753
Ficinia spiralis HUG 2003-0699	Ficinia spiralis (A.Rich.) Muasya & de Lange	HUG 2003-0699 (GENT)	-	GU012395	-	-	-	GU012357	-
Ficinia spiralis X0699	Ficinia spiralis (A.Rich.) Muasya & de Lange	HUG 2003-0699 (GENT)	-	MW278991	-	-	-	MW278925	-
Ficinia stolonifera	Ficinia stolonifera Boeckeler	Muasya 2221 (BOL) & 5877 matK (BOL) & 2259 rbcL (BOL)	-	MW278992	MW339614	-	MW339555	MW278926	-
Ficinia trichodes	Ficinia trichodes (Schrad.) B.D.Jacks.	Muasya 2328 (BOL)	-	AB685864	-	-	EF178558	KM462394	EF178603
Ficinia trispicata	Ficinia trispicata (L.f.) Druce (=Ficinia sylvatica Kunth)	Muasya 2252 (BOL) & 5873 matK (BOL)	-	MW278993	MW339592	-	MW339501	MW278927	-
Ficinia tristachya	Ficinia tristachya (Rottb.) Nees	Muasya 2255 (BOL) & 5772 matK (BOL)	MW267898	MW278994	MW339608	-	MW339530	MW278928	-
Ficinia trollii	Ficinia trollii (Kük.) Muasya & D.A.Simpson	Browning et al. 5970 (NU)	-	-	-	-	AJ404730	-	-
Ficinia truncata	Ficinia truncata (Thunb.) Schrad.	Muasya 2361 (BOL) & 2939 matK (BOL)	MW267899	MW278995	MW339647	-	MW339580	MW278929	-
Ficinia zeyheri	Ficinia zeyheri Boeckeler	Muasya 2208 (BOL)	MW267900	MW278996	-	-	MW339421	MW278930	-
Hellmuthia membranacea Muasya 4527	Hellmuthia membranacea (Thunb.) R.W.Haines & Lye	Muasya 4527 (BOL)	KM462259	KM462323	-	-	-	KM462383	KM462510
Hellmuthia membranacea Muasya 5319	Hellmuthia membranacea (Thunb.) R.W.Haines & Lye	Muasya 5319 (BOL)	KM462260	KM462324	-	-	-	KM462384	KM462511
Isolepis angelica	Isolepis angelica B.L.Burtt	Clarke & McKenzie 107 (GRA)	-	MW278997	-	-	-	-	-
Isolepis antarctica Muasya 2247	Isolepis antarctica (L.) Roem. & Schult.	Muasya 2247 (BOL)	-	MW278998	-	-	MW339570	MW278931	-
Isolepis antarctica Muasya 3007	Isolepis antarctica (L.) Roem. & Schult.	Muasya 3007 (BOL)	MW267901	GU012411	-	-	-	GU012372	MW279033
Isolepis aucklandica	Isolepis aucklandica Hook.f.	Wilson et al. 9462 (K)	-	GU012385	KJ513621	-	-	GU012348	AJ295773
Isolepis basilaris	Isolepis basilaris Hook.f.	AK289204	-	DQ385574	-	-	-	-	-
Isolepis bicolor	Isolepis bicolor Carmich.	Richardson 105 (K)	-	AB983246	-	-	AJ404705	AB983311	AJ295774
Isolepis brevicaulis	Isolepis brevicaulis (Levyns) J.Raynal	Muasya 2912 (BOL) & 3115 matK-rbcL (BOL)	-	MW278999	MW339596	-	MW339441	MW278932	MW279034
Isolepis caligenis	Isolepis caligenis (V.J.Cook) Soják	AK289205	-	DQ385575	-	-	-	-	-
Isolepis capensis	Isolepis capensis Muasya	Muasya 3078 (BOL) & 3122 matK-rbcL (BOL)	-	GU012412	MW339618	-	MW339490	GU012373	MW279035
Isolepis carinata Hyatt 10389	Isolepis carinata Hook. & Arn. ex Torr.	Hyatt 10389 (GENT)	-	MW279000	-	-	-	MW278933	-
Isolepis carinata Reid 7962	Isolepis carinata Hook. & Arn. ex Torr.	Reid 7962 (LSU)	-	-	KX369528	KX405941	-	-	-
Isolepis cernua cernua	Isolepis cernua (Vahl) Roem. & Schult. var. cernua	Muasya 3073 (BOL)	-	GU012413	-	-	-	GU012374	MW279036
Isolepis cernua meruensis	Isolepis cernua var. meruensis (R.W.Haines & Lye) Muasya	Muasya 1061 (K)	-	AB983248	-	-	AJ404715	AB983313	AJ295791
Isolepis cernua platycarpa	Isolepis cernua var. platycarpa (S.T.Blake) Muasya	Covery et al. 17465 (K)	-	AB983249	-	-	AJ404716	AB983314	-
Isolepis costata Muasya 1049	Isolepis costata Hochst. ex A.Rich.	Muasya 1049 (K)	-	-	-	GU075459	Y12981	GU012375	-
Isolepis costata Muasya 1109	Isolepis costata Hochst. ex A.Rich.	Muasya 1109 (K)	MW267902	MW279001	-	-	-	MW278934	MW279037
Isolepis crassiuscula	Isolepis crassiuscula Hook.f.	Bruhl 1825 (NE)	-	MW279002	-	-	-	MW278935	MW279038
Isolepis cyperoides	Isolepis cyperoides R.Br.	Waterway 2006-351 NE)	-	MW279003	-	-	-	MW278936	MW279039
Isolepis diabolica	Isolepis diabolica (Steud.) Schrad.	Muasya 1163 (K)	MW267903	AB983250	-	-	AJ404707	AB983317	AJ295778
Isolepis digitata	Isolepis digitata Nees ex Schrad.	Muasya 1230 (K)	-	GU012415	-	-	AJ404708	GU012376	AJ295779
Isolepis distigmatosa	Isolepis distigmatosa (C.B.Clarke) Edgar	de Lange 014-12E	-	MW279004	-	-	-	-	-
Isolepis expallescens	Isolepis expallescens Kunth	Clarke et al. 156 (GRA)	-	MW279005	-	-	-	MW278937	-
Isolepis expallescens Muasya 3067	Isolepis setacea (L.) R.Br.	Muasya 3067 (BOL)	JX566729	MW279006	-	-	-	MW278938	MW279040
Isolepis fluitans	Isolepis fluitans (L.) R.Br.	Muasya 1007 (K)	KM462254	GU012416	-	-	-	GU012377	KM462525
Isolepis gaudichaudiana Coveny 17476	Isolepis gaudichaudiana Kunth	Coveny 17476 (NSW)	-	AB983252	-	-	AJ404709	AB983320	AJ295781
Isolepis gaudichaudiana Wilson 9483	Isolepis gaudichaudiana Kunth	Wilson 9483 (NSW)	-	-	-	-	-	MW278939	MW279041
Isolepis graminoides	Isolepis graminoides (R.W.Haines & Lye) Lye	Muasya 2597 (BOL)	MW267904	MW279007	-	-	-	MW278940	-
Isolepis habra Coveny 17477	Isolepis habra (Edgar) Soják	Coveny et al. 17477 (NSW)	-	-	-	-	AJ404710	-	-
Isolepis habra Coveny 17480	Isolepis habra (Edgar) Soják	Coveny et al. 17480 (NSW)	MW279025	GU012386	-	-	-	GU012349	AJ295783
Isolepis hemiuncialis	Isolepis hemiuncialis (C.B.Clarke) J.Raynal	Muasya 2895 (BOL)	-	GU012387	-	-	-	GU012350	MW279042
Isolepis hookeriana	Isolepis hookeriana Boeckeler (=Isolepis multicaulis Schltdl.)	Barnett 5173 (K)	-	MW279008	-	-	-	MW278941	MW279043
Isolepis hystrix	Isolepis hystrix (Thunb.) Nees	Muasya 2334 (BOL) & 2971 matK-rbcL (BOL)	-	MW279009	MW339587	-	MW339408	MW278942	-
Isolepis incomtula	Isolepis incomtula Nees	Muasya & Garcia-Madrid 7035 (BOL)	KM462261	KM462330	-	-	-	KM462399	KM462524
Isolepis inconspicua	Isolepis inconspicua (Levyns) J.Raynal	Muasya 2972 (BOL)	-	MW279010	MW339588	-	-	MW278943	MW279044
Isolepis inundata Wilson 9461	Isolepis inundata R.Br.	Wilson et al. 9461 (NSW)	-	-	-	-	AJ404712	-	AJ295786
Isolepis inundata Wilson 9493	Isolepis inundata R.Br.	Wilson et al. 9493 (NSW)	MW267905	GU012390	-	-		GU012352	MW279045
Isolepis inyangensis	Isolepis inyangensis Muasya & Goetgh.	Muasya 2025 (K)	-	AB983255	-	-	AJ297506	AB983322	AJ295787
Isolepis karroica	Isolepis karroica (C.B.Clarke) J.Raynal	Muasya 3064 (BOL) & 3116 matK (BOL) & 3071 rbcL (BOL)	MW267906	MW279011	MW339626	-	MW339488	MW278944	MW279046
Isolepis keniaensis	Isolepis keniaensis Lye	Muasya 2552 (BOL)	MW267907	MW279012	-	-	-	MW278945	MW279047
Isolepis leucoloma	Isolepis leucoloma (Nees) C.Archer	Muasya 2976 (BOL)	KM462257	GU012417	-	-	MW339477	GU012378	KM462528
Isolepis levynsiana	Isolepis levynsiana Muasya & D.A.Simpson	Muasya 2977 (BOL) & 3111 matK-rbcL (BOL)	-	MW279013	MW339583	-	MW339399	MW278946	MW279048
Isolepis ludwigii Muasya 1138	Isolepis ludwigii (Steud.) Kunth	Muasya 1138 (K)	-	AB983257	-	-	-	AB983323	-
Isolepis ludwigii Muasya 1181	Isolepis ludwigii (Steud.) Kunth	Muasya 1181 (K)	-	MW279014	-	-	AJ404713	-	AJ295789
Isolepis marginata Coveny 17452	Isolepis marginata (Thunb.) A.Dietr.	Coveny et al. 17452 (K)	JX566731	-	-	-	AJ404714	EF174391	AJ295790
Isolepis marginata Muasya	Isolepis marginata (Thunb.) A.Dietr.	Muasya 2999 (BOL) & 3012 matK-rbcL (BOL)	-	MW279015	MW339612	-	MW339472	-	MW279049
Isolepis marginata Waterway 2006-332	Isolepis marginata (Thunb.) A.Dietr.	Waterway 2006-332 (NE)	-	MW279016	-	-	-	-	MW279050
Isolepis minuta	Isolepis minuta (Turrill) J.Raynal	Muasya 3083 (BOL) & 5683 matK-rbcL (BOL)	-	MW279017	MW339595	-	MW339435	MW278947	MW279051
Isolepis montivaga	Isolepis montivaga (S.T.Blake) K.L.Wilson	Wilson et al. 9480 (K)	-	AB983258	-	-	AJ297507	AB983324	AJ295792
Isolepis namaquana	Isolepis namaquana Muasya & J.Viljoen	Muasya 2891 (BOL) & 3011 matK (BOL)	-	MW279018	MW339645	-	-	MW278948	MW279052
Isolepis natans	Isolepis natans (Thunb.) A.Dietr.	Muasya 3830 (BOL) & 5860 matK (BOL)	-	-	MW339591	-	-	-	MW279053
Isolepis nigricans	Isolepis nigricans Kunth	Cazalet & Pennington 5357 (K)	-	MW279019	-	-	-	MW278949	MW279054
Isolepis pellocolea	Isolepis pellocolea B.L.Burtt	Gordon-Gray 49694 (NU)	-	AB983259	-	-	AJ404729	AB983325	AB983303
Isolepis pottsii	Isolepis pottsii (V.J.Cook) Soják	AK289620	-	DQ385583	-	-	AB983293	AB983326	AB983304
Isolepis producta AK331324	Isolepis producta (C.B.Clarke) K.L.Wilson	AK331324 New Zealand	-	AB825968	-	-	AB825966	AB983327	AB825967
Isolepis producta K7510	Isolepis producta (C.B.Clarke) K.L.Wilson	Wilson 7510 (NSW)	-	LC102361	-	-	LC102343	LC102352	LC102356
Isolepis prolifera Coveny 17487	Isolepis prolifera (Rottb.) R.Br.	Coveny et al. 17487 (NSW)	KM462256	KM462333	-		AJ404718	KM462397	AJ295796
Isolepis prolifera Muasya	Isolepis prolifera (Rottb.) R.Br.	Muasya 1168 (K) & 1160 ndhF (K) & 5713 rbcL (BOL)	MW267908	GU012419	-	AM999935	MW339440	GU012379	MW279055
Isolepis pusilla	Isolepis pusilla Kunth	Muasya 2975 (BOL)	-	MW279020	-	-	MW339518	MW278950	MW279056
Isolepis reticularis	Isolepis reticularis Colenso	AK289481	-	DQ385585	-	-	AB983295	AB983329	AB983306
Isolepis rubicunda	Isolepis rubicunda Kunth	Muasya 1154 (K) & 5321 matK-rbcL (BOL)	KM462258	KM462334	MW339641	-	MW339535	KM462398	AB983307
Isolepis sepulcralis	Isolepis sepulcralis Steud.	Muasya 1211 (K) & 2370 rbcL (BOL)	MW267909	MW279021	-	-	MW339542	MW278951	MW279057
Isolepis setacea Muasya 1059	Isolepis setacea (L.) R.Br.	Muasya 1059 (K)	-	AY242053	-	-	MW267913	EF174392	AJ295799
Isolepis sororia	Isolepis sororia Kunth	Muasya 3030 (BOL)	-	-	MW339628	-	MW339507	-	-
Isolepis striata Muasya 1141	Isolepis striata (Nees) Kunth	Muasya 1141 (K)	-	-	-	-	AJ404721	AB983331	AJ295801
Isolepis striata Muasya 2906	Isolepis striata (Nees) Kunth	Muasya 2906 (K)	-	AB983260	-	-	-	MW278952	MW279058
Isolepis subtilissima	Isolepis subtilissima Boeckeler	Coveny 17475 (K)	-	AB983261	-	-	AJ297508	AB983332	AJ295800
Isolepis sulcata	Isolepis sulcata (Thouars) Carmich.	Richardson 80 (K)	-	GU012393	-	-	AJ404722	GU012355	-
Isolepis tenuissima	Isolepis tenuissima (Nees) Kunth	Muasya 2369 (BOL)	-	MW279022	-	-	MW267914	MW278953	MW279059
Isolepis trachysperma	Isolepis trachysperma Nees	Muasya 2905 (BOL)	MW267910	MW279023	-	-	-	MW278954	MW279060
Isolepis varians Pisano 259	Isolepis varians Steud.	Pisano 259 (K)	-	-	-	-	AJ404723	AB983333	-
Isolepis varians X5624	Isolepis varians Steud.	Pisano 5624 K)	-	MW279024	-	-	-	MW278955	MW279061
Isolepis venustula	Isolepis venustula Kunth	Muasya 1189 (K)	-	GU012421	-	-	AJ404724	GU012381	AJ295804
Isolepis wakefieldiana	Isolepis wakefieldiana (S.T.Blake) K.L.Wilson	Neish et al. 110 (K)	-	AB983263	-	-	AJ404726	AB983334	AJ295806
Scirpoides burkei	Scirpoides burkei (C.B.Clarke) Goetgh., Muasya & D.A.Simpson	Muasya 43mL10 (BOL)	KM462224	KM462295	-	-	-	KM462363	KM462490
Scirpoides globerifera	Scirpoides globifera (L.f.) Soják (=Scirpoides holoschoenus subsp. globifera (L.f.) Soják)	Garcia-Madrid & Molina TEN1-SCI3 (MAF)	KM462206	KM462270	-	-	-	KM462338	KM462479
Scirpoides holoschoenus australis	Scirpoides holoschoenus subsp. australis (L.) Soják	García-Madrid & Molina DON1-SCI2 (MAF)	KM462200	KM462274	-	-	-	KM462341	KM462473
Scirpoides holoschoenus holoschoenus	Scirpoides holoschoenus subsp. holoschoenus (L.) Soják	García-Madrid & Molina ARA2-SCI5 (MAF)	KM462214	KM462282	-	-	-	KM462350	KM462466
Scirpoides romana	Scirpoides romana (L.) Soják (=Scirpoides holoschoenus subsp. holoschoenus (L.) Soják)	Garcia-Madrid et al. 172412 (MAF)	KM462217	KM462284	-	-	-	KM462354	KM462481
Scirpoides thunbergii	Scirpoides thunbergii (Schrad.) Soják	Muasya 3896a (BOL)	KM462226	KM462297	-	-	-	KM462365	KM462492
Scirpoides varia	Scirpoides varia Browning	Haines 7045 (PRE)	KM462218	KM462286	-	-	-	KM462361	KM462482
