# Supplementary material for: Delimiting the genera of the Ficinia Clade (Cypereae, Cyperaceae) based on molecular phylogenetic data
Source: PeerJ. 2021 Jan 26;9:e10737. doi: 10.7717/peerj.10737 (PMC7845527; doi:10.7717/peerj.10737)
Supplement: Supplemental Information 4 [file peerj-09-10737-s004.xlsx]

## Sheet: TABLE S2
TABLE S2 Voucher information of the outgroup accessions used in the molecular study, including GenBank accession numbers.
Name in dataset	Name with taxonomic authority	ETS	ITS	matK	ndhF	rbcL	rps16	trnLF
Bolboschoenus fluviatilis	Bolboschoenus fluviatilis (Torr.) Soják	-	GQ130340	MG217063	-	GQ130358	-	JF313190
Bolboschoenus glaucus	Bolboschoenus glaucus (Lam.) S.G.Sm.	-	-	-	-	-	-	AJ295767		LEGEND	black	Madagascar dataset
Bolboschoenus maritimus	Bolboschoenus maritimus (L.) Palla	-	JF31379	HM850837	GU075519	HM849817	-	JF313191			green	GenBank
Bolboschoenus nobilis	Bolboschoenus nobilis (Ridl.) Goetgh. & D.A.Simpson	-	-	KX036942	KX036955	-	-	-
Bolboschoenus planiculmis	Bolboschoenus planiculmis (F.Schmidt) T.V.Egorova	-	GQ130341	-	-	GQ130359	-	JF313192
Bolboschoenus robustus	Bolboschoenus robustus (Pursh) Soják	-	KC677980	KX036983	KC678064	KX036971	-	KC678034
Bolboschoenus yagara	Bolboschoenus yagara (Ohwi) Y.C.Yang & M.Zhan	-	AB261673	-	AB261641	AB369956	-	-
Fuirena abnormalis	Fuirena abnormalis C.B.Clarke	-	-	-	AM999930	-	-
Fuirena breviseta	Fuirena breviseta (Coville) Coville	-	-	KY607243	KC678065	KX397802	-	KC678035
Fuirena ciliaris	Fuirena ciliaris (L.) Roxb.	-	AB373099	-	GU075462	Y12971	-	JX644791
Fuirena coerulescens	Fuirena coerulescens Steud.	-	-	-	-	EF178566	-	-
Fuirena pubescens	Fuirena pubescens (Poir.) Kunth	KM462197	KM462263	-	-	-	-	-
Fuirena pumila	Fuirena pumila (Torr.) Spreng.	-	-	KJ772800	GU075464	KY627378	-	-
Fuirena scirpoidea	Fuirena scirpoidea Michx.	-	-	MH551854	GU075465	KY627042	-	-
Fuirena simplex	Fuirena simplex Vahl	-	AF190617	-	GU075470	-	-	-
Fuirena stricta	Fuirena stricta Steud.	MH286444	MH286445	-	-	MH286437	-	-
Fuirena umbellata	Fuirena umbellata Rottb.	-	JX644892	KX036936	KX036953	AB981755	-	JX644792
Fuirena welwitschii	Fuirena welwitschii Ridl.	-	-	KX036937	KX036954	Y12993	-	-
Actinoscirpus grossus	Actinoscirpus grossus (L.f.) Goetgh. & D.A.Simpson	-	AB261672	KX036976	AB261640	AB369955	-	AB679910
Schoenoplectus acutus	Schoenoplectus acutus (Muhl. ex Bigelow) Á.Löve & D.Löve	-	MG216793	KX677321	KC678037	MG228251	-	KC678010
Schoenoplectus americanus	Schoenoplectus americanus (Pers.) Volkart	-	KC677959	-	KC678043	-	-	KC678015
Schoenoplectus californicus	Schoenoplectus californicus (C.A.Mey.) Soják	-	KC677954	KX036980	KC678038	KX036969	-	KC678011
Schoenoplectus deltarum	Schoenoplectus deltarum (Schuyler) Soják	-	KC677960	-	KC678044	-	-	KC678016
Schoenoplectus etuberculatus	Schoenoplectus etuberculatus (Steud.) Soják	-	KC677964	-	KC678048	-	-	KC678020
Schoenoplectus heterochaetus	Schoenoplectus heterochaetus (Chase) Soják	-	-	-	KC678039	MG228243	-	KC678012
Schoenoplectus lacustris	Schoenoplectus lacustris (L.) Palla	-	-	JN895489	AM999958	Y12943	AF449554	-
Schoenoplectus litoralis	Schoenoplectus litoralis (Schrad.) Palla	-	-	-	-	EF178571	JX566749	AY506697
Schoenoplectus pungens	Schoenoplectus pungens (Vahl) Palla	-	MG216042	KX036979	KC678047	MG227695	-	KC678017
Schoenoplectus subterminalis	Schoenoplectus subterminalis (Torr.) Soják	-	KC677965	KX036977	KC678049	MG227872	-	KC678021
Schoenoplectus tabernaemontani	Schoenoplectus tabernaemontani (C.C.Gmel.) Palla	AB206283	MH891850	MF350286	KC678040	MG227419	-	KC678013
Schoenoplectus torreyi	Schoenoplectus torreyi (Olney) Palla	-	-	KX036978	KC678051	MG227589	-	KC678022
Schoenoplectus triqueter	Schoenoplectus triqueter (L.) Palla	AB206284	KC677957	LC219228	AB373101	LC219117	-	KC678014
Pseudoschoenus inanis	Pseudoschoenus inanis (Thunb.) Oteng-Yeb.	KM462196	KM462265	KX036928	-	KF553612	KM462401	KF553520
Schoenoplectiella articulata	Schoenoplectiella articulata (L.) Lye	-	JX566742	***	***	Y12987	-	-
Schoenoplectus corymbosus	Schoenoplectus corymbosus (Roth ex Roem. & Schult.) J.Raynal	KM462195	KM462264	-	-	EF178570	KM462400	KM462532
Schoenoplectiella erecta	Schoenoplectiella erecta (Poir.) Lye	-	KC677975	-	KC678059	KX036962	-	-
Schoenoplectiella hallii	Schoenoplectiella hallii (A.Gray) Lye	-	KC677976	MK520615	KC678060	MK526624	-	KC678031
Schoenoplectiella hotarui	Schoenoplectiella hotarui (Ohwi) J.Jung & H.K.Choi	AB206274	GQ130345	-	AB261643	GQ130360	-	-
Schoenoplectiella humillima	Schoenoplectiella humillima (Benth.) Shiels, Glon & Monfils			KX036927			AF449539	KC678066
Schoenoplectiella juncea	Schoenoplectiella juncea (Willd.) Lye	-	-	***	***	Y12952	-	-
Schoenoplectiella juncoides	Schoenoplectiella juncoides (Roxb.) Lye	-	-	-	-	GQ130361	-	JF313197
Schoenoplectiella lineolata	Schoenoplectiella lineolata (Franch. & Sav.) J.Jung & H.K.Choi	AB206277	GQ130347	-	-	GQ130362	-	-
Schoenoplectiella mucronata	Schoenoplectiella mucronata (L.) J.Jung & H.K.Choi	AB206278	KC677979	-	KC678063	KX036961	-	KC678033
Schoenoplectiella purshiana	Schoenoplectiella purshiana (Fernald) Lye	-	-	KX036975	KC678055	MG227821	-	KC678025
Schoenoplectiella saximontana	Schoenoplectiella saximontana (Fernald) Lye	-	KC677977	-	KC678061	KX036964	-	KC678032
Schoenoplectiella senegalensis	Schoenoplectiella senegalensis (Steud.) Lye	-	-	-	-	EF178568	-	-
Schoenoplectiella smithii	Schoenoplectiella smithii (A.Gray) Hayas.	-	-	-	KC678056	MG228235	-	KC678029
Schoenoplectiella supina	Schoenoplectiella supina (L.) Lye	-	MG216705	-	-	MG228053	-	-
Schoenoplectiella wallichii	Schoenoplectiella wallichii (Nees) Lye	-	-	-	-	JF313188	-	JF313203
Cyperus acuminatus	Cyperus acuminatus Torr. & Hook.	-	KF146652	KX369421	KX405843	MG225775	-	-
Cyperus alopecuroides	Cyperus alopecuroides Rottb.	HE993959	KX306829	KX369424	KX405845	MF668590	-	-
Cyperus alternifolius	Cyperus alternifolius L.	HQ705948	-	HQ180861	HQ181110	AM999802	-	JX644796
Cyperus articulatus	Cyperus articulatus L.	-	KF150538	KX369427	KX405847	MK285221	-	-
Cyperus ascocapensis	Cyperus ascocapensis Bauters	HQ705957	-	-	-	AM999786	KM462408	-
Cyperus assimilis	Cyperus assimilis Steud.	HQ705939	-	-	-	MK285163	AF449519	-
Cyperus blepharoleptos	Cyperus blepharoleptos Steud.	HQ705942	KF150596	KX369537	KX405834	-	-	-
Cyperus brevifolius	Cyperus brevifolius (Rottb.) Hassk.	HE993988	KF150590	KX369530	KX405943	-	AF449543	AF449576
Cyperus compressus	Cyperus compressus L.	HE993963	KF193575	KX369435	KX405853	AF449506	AF449521	-
Cyperus croceus	Cyperus croceus Vahl	HE993965	KF150543	KX369438	KX405855	KY626944	-	-
Cyperus cuspidatus	Cyperus cuspidatus Kunth	HQ705954	KF150544	KX369439	-	AF449508	AF449523	AF449569
Cyperus cyperoides	Cyperus cyperoides (L.) Kuntze	-	KM462266	-	-	AF449509	KM462404	KM462535
Cyperus dichrostachyus	Cyperus dichrostachyus Hochst. ex A.Rich.	HQ705944	JX566744	-	FM160530	Y12965	KM462403	AF449571
Cyperus difformis	Cyperus difformis L.	HQ705945	KF150545	KX369440	KX405856	JX644656	-	-
Cyperus digitatus	Cyperus digitatus Roxb.	-	KF150546	KX369442	KX405858	JQ591224	-	-
Cyperus distinctus	Cyperus distinctus Steud.	HQ705907	KF150547	KX369445	KX405861	-	-	-
Cyperus echinatus	Cyperus echinatus (L.) Alph.Wood	-	KF150548	KX369447	KX405863	MF349757	-	-
Cyperus elegans	Cyperus elegans L.	HQ705959	KF150550	KX369448	KX405864	-	-	-
Cyperus endlichii	Cyperus endlichii Kük.	HE993968	-	-	-	AF449510	AF449526	AF449572
Cyperus eragrostis	Cyperus eragrostis Lam.	HQ705904	KF150551	KX369451	KX405867	HM849936	-	-
Cyperus erinaceus	Cyperus erinaceus (Ridl.) Kük.	HQ705969	-	-	AM999969	AJ404699	AF449552	-
Cyperus esculentus	Cyperus esculentus L.	HQ705960	KX306841	KX369454	KX405870	HM849937	LK029869	-
Cyperus filiformis	Cyperus filiformis Sw.	-	KX306843	KY794182	KX405876	-	-	-
Cyperus flavescens	Cyperus flavescens L.	HE993999	KF150598	KX369460	KX405877	MG227544	AF449547	-
Cyperus fuscus	Cyperus fuscus L.	HQ705946	KF150555	KX369463	KX405880	AM999806	-	-
Cyperus haspan	Cyperus haspan L.	HQ705927	KF150557	KX369467	-	JX644661	-	KR869859
Cyperus hemidrummondii	Cyperus hemidrummondii Goetgh.	HF586606	-	-	-	MK526109	-	-
Cyperus hyalinus	Cyperus hyalinus Vahl	KF150602	KX369468	KX405884	KX405884	AY725953	-	-
Cyperus iria	Cyperus iria L.	HE993972	KX306848	KX369473	KX405888	KR869866	-	KR869858
Cyperus isolepis	Cyperus isolepis (Nees) Bauters	HF586633	-	-	-	AF449516	AF449546	AF449577
Cyperus kyllingiella	Cyperus kyllingiella Larridon	HQ705952	-	-	-	AY040592	KM462410	AJ297515
Cyperus laevigatus	Cyperus laevigatus L.	HE993976	-	-	-	Y13017	AF449527	-
Cyperus lecontei	Cyperus lecontei Torr. ex Steud.	-	KF150562	KX369475	KX405890	KY627466	-	-
Cyperus leptocarpus	Cyperus leptocarpus (F.Muell.) Bauters	HF586621	JX644895	KX036930	AB261636	JX644700	-	JX644797
Cyperus ligularis	Cyperus ligularis L.	-	KX306849	KX369476	KX405891	KJ773429	-	-
Cyperus longus	Cyperus longus L.	HE993977	-	JN894347	FM160536	Y13015	AF449528	-
Cyperus lupulinus	Cyperus lupulinus (Spreng.) Marcks	-	KF150654	KX369479	KX405894	HQ590056	-	-
Cyperus luzulae	Cyperus luzulae (L.) Retz.	HQ705910	KF150565	KX369480	KX405895	JQ591243	-	-
Cyperus macrostachyos	Cyperus macrostachyos Lam.	HE994008	KF150599	KX369461	KX405878	-	-	-
Cyperus microiria	Cyperus microiria Steud.	-	KR869864	KY386839	-	KR869868	-	KR869862
Cyperus mindorensis	Cyperus mindorensis (Steud.) Huygh	HQ705965	-	-	-	-	-	-
Cyperus neotropicalis	Cyperus neotropicalis Alain	HF586615	KF150594	KX369535	-	-	-	-
Cyperus ochraceus	Cyperus ochraceus Vahl	HQ705911	KF150567	KX369485	KX405900	-	-	-
Cyperus odoratus	Cyperus odoratus L.	-	KF150568	KX369486	KX405901	KY627395	-	-
Cyperus papyrus	Cyperus papyrus L.	HQ705962	AY242048	-	-	Y12966	KM462406	-
Cyperus pedunculatus	Cyperus pedunculatus (R.Br.) J.Kern	HQ705968	KX306854	KX369492	KX405907	-	AF449550	-
Cyperus persquarrosus	Cyperus persquarrosus T.Koyama	HE994031	-	-	-	AM999847	KM462407	-
Cyperus plukenetii	Cyperus plukenetii Fernald	-	KF150574	KX369496	KX405910	KY626895	-	-
Cyperus polystachyos	Cyperus polystachyos Rottb.	HQ705966	KF150600	KX369499	KX405913	KR869867	-	KR869863
Cyperus prolifer	Cyperus prolifer Lam.	HQ705928	KF150575	KX369501	KX405915	GU135226	-	-
Cyperus proteus	Cyperus proteus (Welw.) Bauters	HE993957	-	-	-	Y13002	-	-
Cyperus pseudovegetus	Cyperus pseudovegetus Steud.	HQ705912	KF150577	KX369503	KX405917	KX397759	-	-
Cyperus pulchellus	Cyperus pulchellus R.Br.	-	JX566736	-	FM160538	AM999812	-	AY040599
Cyperus rotundus	Cyperus rotundus L.	HQ705963	KF150582	KX369514	KX405927	JX644667	-	JX644807
Cyperus sanguinolentus	Cyperus sanguinolentus Vahl	HE994022	KF150601	KX369515	-	AB369952	-	AF449579
Cyperus sellowianus	Cyperus sellowianus (Kunth) T.Koyama	HF586610	KF150593	KX369534	KX405947	-	-	-
Cyperus seslerioides	Cyperus seslerioides Kunth	-	KX306830	KX369425	KX405846	MH028799	-	-
Cyperus sesquiflorus	Cyperus sesquiflorus (Torr.) Mattf. & Kük. subsp. sesquiflorus	HE993991	KF150591	KX369531	KX405944	KJ773610	AF449542	-
Cyperus squarrosus	Cyperus squarrosus L.	-	KF150583	KX369518	KX405930	MH028798	-	AF285071
Cyperus steudneri	Cyperus steudneri (Boeckeler) Larridon	HQ705953	-	-	-	Y13013	AF449541	-
Cyperus strigosus	Cyperus strigosus L.	HE993986	KF150584	KX369520	KX405932	MG226606	-	-
Cyperus subsquarrosus	Cyperus subsquarrosus (Muhl.) Bauters	HE994032	KF150595	KX369536	KX405948	MK526110	-	-
Cyperus surinamensis	Cyperus surinamensis Rottb.	HQ705906	KF150585	KX369522	KX405934	KY627149	-	-
Cyperus tetragonus	Cyperus tetragonus Elliott	-	KF150586	KX369523	KX405935	KY626942	-	-
Cyperus virens	Cyperus virens Michx.	-	KX306866	KX369526	KX405938	KJ773436	-	-
